# Supplementary material for: Ultrasmall MoS2 embedded in carbon nanosheets-coated Sn/SnOx as anode material for high-rate and long life Li-ion batteries
Source: Royal Society of Chemistry journal article supplement (doi:10.1039/c6ta10932b), 2017-01-01
Supplement: c6ta10932b1.pdf [file c6ta10932b1.pdf]

## Supporting Information

### **Ultrasmall MoS<sub>2</sub> Embedded in Carbon Nanosheets Coated Sn/SnO<sub>x</sub> as Anode Material for High-Rate and Long Life Li-Ion Batteries**

*Hongqiang Wang,<sup>a</sup> Qichang Pan,<sup>a</sup> Qiang Wu,<sup>a</sup> Xiaohui Zhang,<sup>ab</sup> Youguo Huang,<sup>a</sup> Andrew Lushington,<sup>b</sup> Qingyu Li<sup>\*ac</sup> and Xueliang Sun<sup>\*b</sup>*

a School of Chemical and Pharmaceutical Sciences, Guangxi Normal University, Guilin, 541004, China

b Department of Mechanical and Materials Engineering, The University of Western Ontario, London ON N6A5B8, Canada

c Guangxi Key Laboratory of Low Carbon Energy Materials, Guangxi Normal University, Guilin, 541004, China

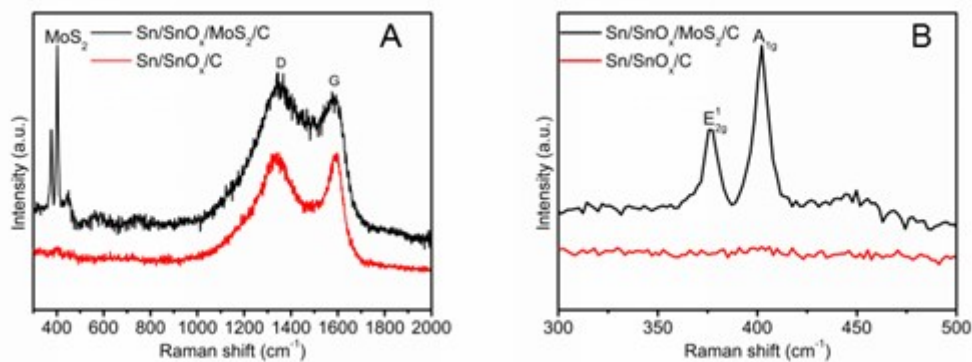

**Fig. S1** (A) Raman spectrum of Sn/SnO<sub>x</sub>/MoS<sub>2</sub>/C and Sn/SnO<sub>x</sub>/C composite. (B) Magnified Raman spectrum of Sn/SnO<sub>x</sub>/MoS<sub>2</sub>/C and Sn/SnO<sub>x</sub>/C composite, exhibiting the typical MoS<sub>2</sub> characteristic signature.

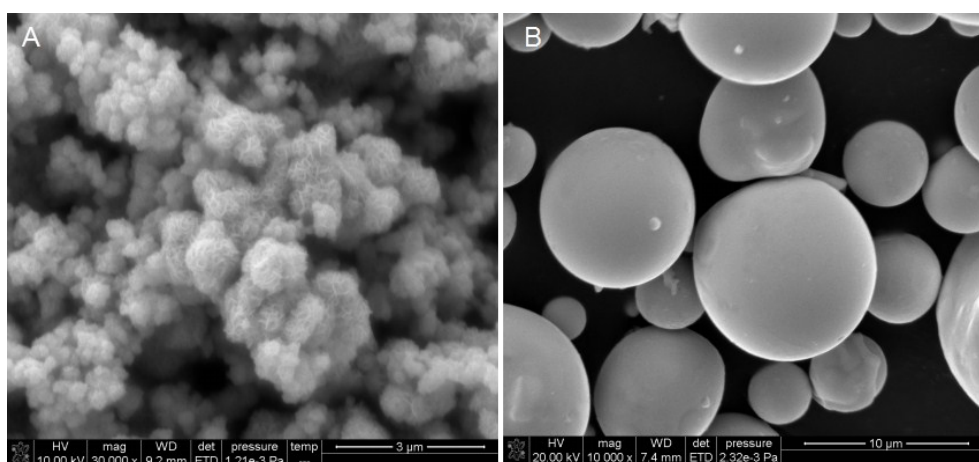

**Fig. S2** (A) SEM images of MoS<sub>2</sub> and (B) pure Sn.

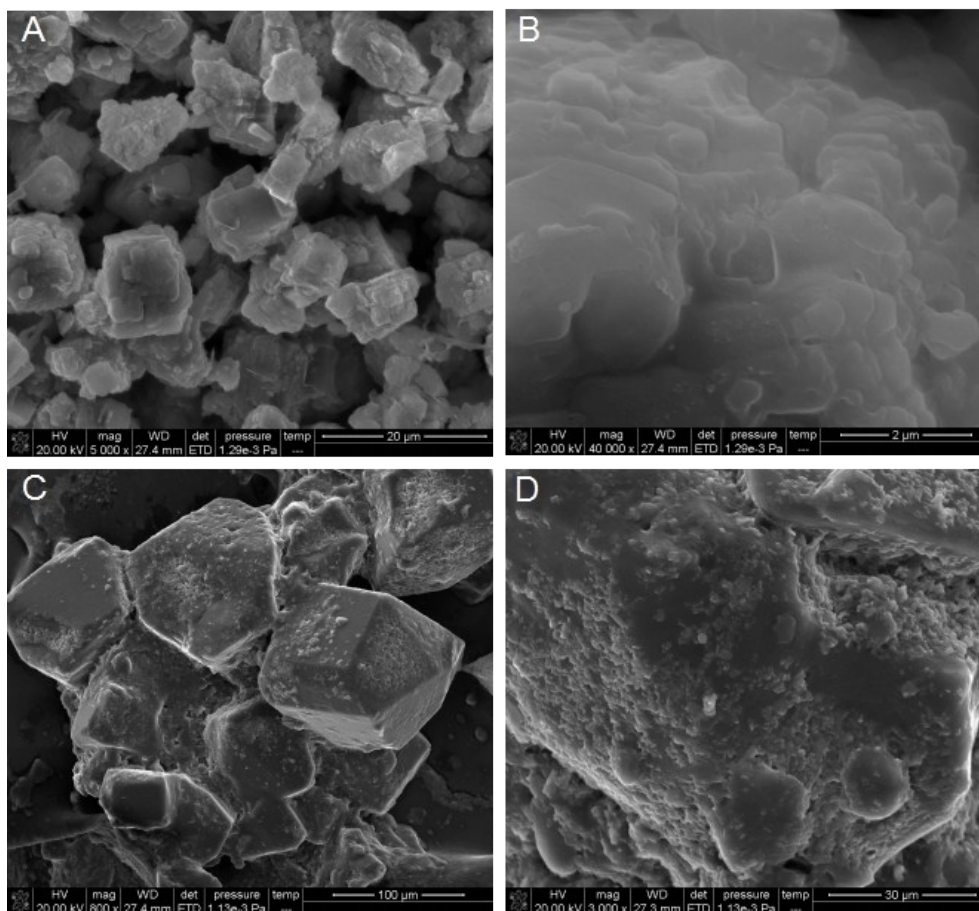

**Fig. S3** (A,B) SEM images of Sn/SnO<sub>x</sub>/C composite containing NaCl. (B) Sn/SnO<sub>x</sub>/C composite without NaCl.

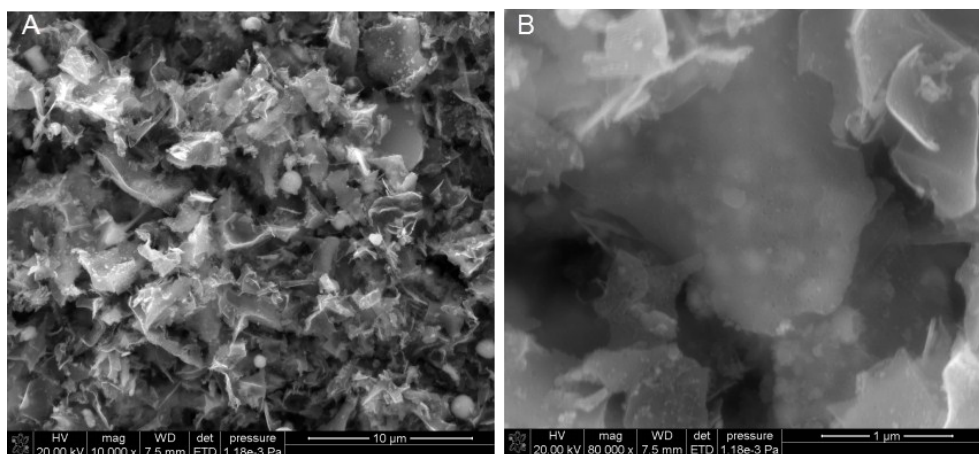

**Fig. S4** SEM images of Sn/SnO<sub>x</sub>/C composite after remove NaCl.

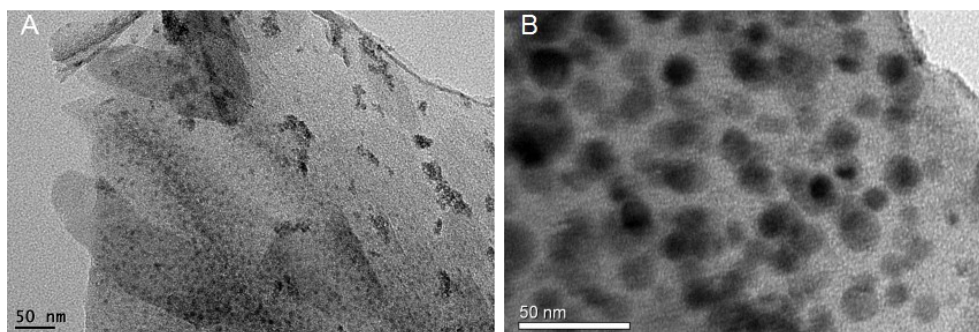

**Fig. S5** (A) TEM images of Sn/SnO<sub>x</sub>/C composite with adding NaCl and (B) Sn/SnO<sub>x</sub>/C composite without adding NaCl.

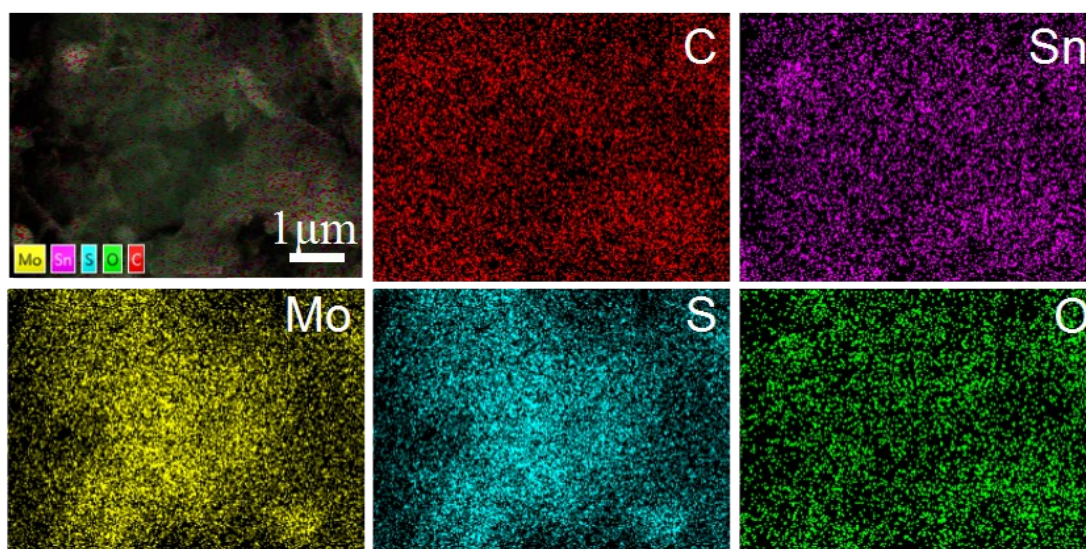

**Fig. S6** SEM and EDS mapping images of Sn/SnO<sub>x</sub>/MoS<sub>2</sub>/C composite.

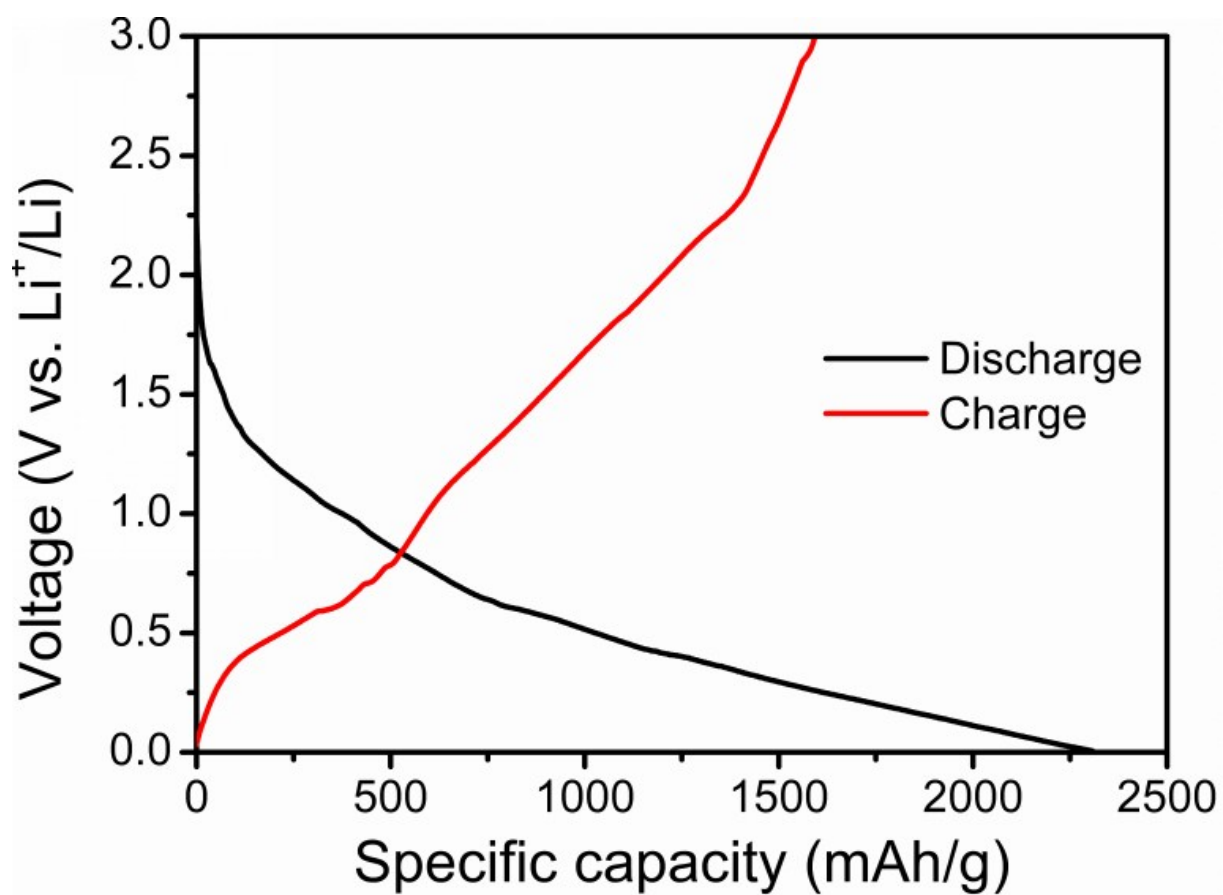

**Fig. S7** The first charge and discharge profile of the prepared Sn/SnO<sub>x</sub>/MoS<sub>2</sub>/C-II composite.

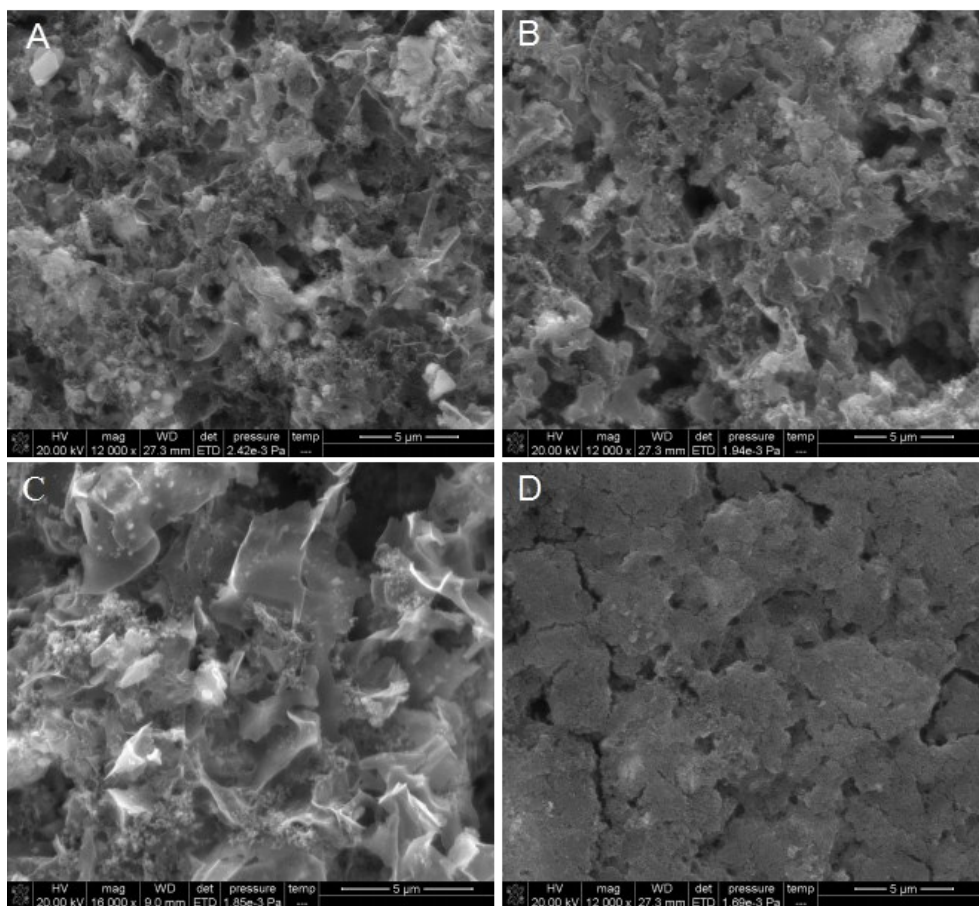

**Fig. S8** SEM images of Sn/SnO<sub>x</sub>/MoS<sub>2</sub>/C and Sn/SnO<sub>x</sub>/C electrode before cycle (A,C) and after 500 cycles (B,D) at a current density of 1A/g.

**Table S1** A summary of recent studies on MoS<sub>2</sub>-based electrode for lithium-ion battery

| <b>Materials</b>                                                        | <b>Cycling stability<br/>(mAh g<sup>-1</sup>)</b> | <b>Rate capability<br/>(mAh g<sup>-1</sup>)</b> | <b>Ref</b> |
|-------------------------------------------------------------------------|---------------------------------------------------|-------------------------------------------------|------------|
| MoS <sub>2</sub> Nanosheets<br>Supported on N-doped<br>Carbon Nanoboxes | 952 at 0.4 A g <sup>-1</sup> (200 cycles)         | 403 at 8.0 A g <sup>-1</sup>                    | 23         |
| MoS <sub>2</sub> Embedded in<br>Carbon Nanofibers                       | 661 at 10 A g <sup>-1</sup> (1000 cycles)         | 374 at 50 A g <sup>-1</sup>                     | 24         |
| Hierarchical MoS <sub>2</sub>                                           | 957 at 0.1 A g <sup>-1</sup> (50 cycles)          | 800 at 1 A g <sup>-1</sup>                      | 25         |
| MoS <sub>2</sub> /reduced<br>graphene oxide                             | 1050 at 0.1 A g <sup>-1</sup> (100 cycles)        | 875 at 1 A g <sup>-1</sup>                      | 27         |
| MoS <sub>2</sub> @graphene<br>nanocables                                | 1150 at 0.5 A g <sup>-1</sup> (150 cycles)        | 700 at 10 A g <sup>-1</sup>                     | 28         |
| SnO <sub>2</sub> /MoS <sub>2</sub>                                      | 700 at 1 A g <sup>-1</sup> (50 cycles)            | 200 at 4 A g <sup>-1</sup>                      | 37         |
| Sn/MoS <sub>2</sub> /C                                                  | 624 at 1 A g <sup>-1</sup> (500 cycles)           | 630 at 2 A g <sup>-1</sup>                      | 49         |
| MoS <sub>2</sub> /graphene                                              | 309 at 10 A g <sup>-1</sup> (1800 cycles)         | 303 at 30 A g <sup>-1</sup>                     | S1         |
| Nitrogen-Doped Carbon<br>Embedded MoS <sub>2</sub> Microspheres         | 1050 at 0.15 A g <sup>-1</sup> (300 cycles)       | 550 at 3 A g <sup>-1</sup>                      | S2         |
| Sn/SnOx/MoS <sub>2</sub> /C                                             | 725 at 3 A g <sup>-1</sup> (800 cycles)           | 698 at 5 A g <sup>-1</sup>                      | this work  |

1. Y. Liu, X. Z. Wang, X. D. Song, Y. F. Dong, L. Yang, L. X. Wang, D. Z. Jia, Z. B. Zhao, J. S. Qiu, Carbon, 2016, 109, 461.

2. D. Xie, X. H. Xia, Y. D. Wang, D. H. Wang, Y. Zhong, W. J. Tang, X. L. Wang, and J. P. Tu, Chem. Eur. J. 2016, 22, 11617.
